# Supplementary material for: Breath Fingerprint of Colorectal Cancer Patients Based on the Gas Chromatography–Mass Spectrometry Analysis
Source: MDPI journal article supplement (doi:10.3390/ijms25031632), 2024-01-29
Supplement: s1 [file s1]

**Table S1.** The full list of breath compounds exhibiting differences between colorectal cancer (CRC) patients and controls.

| Compound name                                 | CAS          | <i>p-value</i> | Median Breath gradient |          |              |
|-----------------------------------------------|--------------|----------------|------------------------|----------|--------------|
|                                               |              |                | Change                 | Controls | CRC patients |
| p-xylene                                      | 106-42-3     | 0,0005         | ↑                      | 1504742  | 2289566      |
| hexanal                                       | 66-25-1      | 0,0012         | ↑                      | 1091070  | 1369804      |
| 2-methyl-1,3-dioxolane                        | 497-26-7     | 0,0024         | ↑                      | 331109   | 484592       |
| 2,2,4-trimethyl-1,3-pentanediol diisobutyrate | 6846-50-0    | 0,0025         | ↑                      | 1030684  | 1341632      |
| hexadecane                                    | 544-76-3     | 0,0026         | ↑                      | 838697   | 1598483      |
| nonane                                        | 111-84-2     | 0,0028         | ↑                      | 354633   | 484690       |
| ethylbenzene                                  | 100-41-4     | 0,0028         | ↑                      | 357817   | 596334       |
| cyclohexanone                                 | 108-94-1     | 0,0045         | ↑                      | 164463   | 210847       |
| diethyl phthalate                             | 84-66-2      | 0,0060         | ↑                      | 2372295  | 3810126      |
| 6-methyl-5-hepten-2-one                       | 110-93-0     | 0,0076         | ↑                      | 655879   | 852666       |
| tetrahydro-2h-pyran-2-one                     | 542-28-9     | 0,0093         | ↑                      | 183202   | 274253       |
| 2-butanone                                    | 78-93-3      | 0,0109         | ↑                      | 485529   | 690855       |
| benzaldehyde                                  | 100-52-7     | 0,0126         | ↑                      | 4721459  | 5998416      |
| dodecanal                                     | 112-54-9     | 0,0127         | ↑                      | 561576   | 735169       |
| benzothiazole                                 | 95-16-9      | 0,0148         | ↑                      | 158701   | 199243       |
| tetradecane                                   | 629-59-4     | 0,0178         | ↑                      | 1098813  | 1521759      |
| 1-dodecanol                                   | 112-53-8     | 0,0202         | ↑                      | 544799   | 712005       |
| 1-butanol                                     | 71-36-3      | 0,0204         | ↑                      | 593792   | 717135,5     |
| benzene                                       | 71-43-2      | 0,0280         | ↑                      | 1148309  | 1830674      |
| 3-methylcyclopentyl acetate                   | 24070-70-0   | 0,0322         | ↑                      | 319377   | 406271       |
| 1-nonene                                      | 124-11-8     | 0,0342         | ↑                      | 247535,5 | 318057       |
| toluene                                       | 108-88-3     | 0,0457         | ↑                      | 1192237  | 1553576      |
| 1,2-benzenedicarboxaldehyde                   | 643-79-8     | 0,0505         | ↑                      | 5962967  | 6721031      |
| o-xylene                                      | 95-47-6      | 0,0540         | ↑                      | 324748,5 | 482457       |
| n,n-dimethyl-methylamine                      | 75-50-3      | 0,0572         | ↑                      | 288222,5 | 364084       |
| octane                                        | 111-65-9     | 0,0632         | ↑                      | 331359,5 | 413934       |
| 3-hydroxy-4-methoxybenzaldehyde, tbdms        | 1000461-64-9 | 0,0668         | ↑                      | 1774734  | 2032718      |
| 2-pentanone                                   | 107-87-9     | 0,0683         | ↑                      | 675490   | 910249       |
| 1,2-ethanediol                                | 107-21-1     | 0,0702         | ↑                      | 209433   | 276367       |
| undecanal                                     | 112-44-7     | 0,0726         | ↑                      | 537808   | 606151       |
| 2-ethoxy-ethanol                              | 110-80-5     | 0,0845         | ↑                      | 472953   | 569275       |
| isopropyl myristate                           | 110-27-0     | 0,0876         | ↑                      | 468005,5 | 1101405      |
| 2-heptanone                                   | 110-43-0     | 0,0893         | ↑                      | 244945,5 | 347630       |
| isoprene                                      | 78-79-5      | 0,0908         | ↑                      | 57107655 | 70278739     |
| 1-pentanol                                    | 71-41-0      | 0,0922         | ↑                      | 58115    | 89359        |

|                                  |              |        |   |          |          |
|----------------------------------|--------------|--------|---|----------|----------|
| heptanal                         | 111-71-7     | 0,1078 | ↑ | 1028365  | 1602589  |
| acetic acid                      | 64-19-7      | 0,1098 | ↑ | 6367227  | 8509098  |
| 2,4-dimethyl-1-heptene           | 19549-87-2   | 0,1107 | ↓ | 659368   | 544864   |
| methyl-cyclohexane               | 108-87-2     | 0,1119 | ↓ | 728166   | 451208   |
| dimethyl-silanediol              | 1066-42-8    | 0,1210 | ↓ | 911363   | 775272   |
| acetoin                          | 513-86-0     | 0,1219 | ↑ | 543455,5 | 766922   |
| 1-octene                         | 111-66-0     | 0,1256 | ↑ | 264178,5 | 307074   |
| acetone                          | 67-64-1      | 0,1268 | ↑ | 79872400 | 88564930 |
| nonanal                          | 124-19-6     | 0,1350 | ↑ | 3512474  | 3641652  |
| 2-nonanone                       | 821-55-6     | 0,1409 | ↑ | 197462   | 294991   |
| phenylethyne                     | 536-74-3     | 0,1446 | ↑ | 67835    | 87521    |
| azulene                          | 275-51-4     | 0,1480 | ↑ | 411085   | 457177   |
| p-cresol                         | 106-44-5     | 0,1487 | ↑ | 768100   | 1023809  |
| heptane                          | 142-82-5     | 0,1489 | ↑ | 711005   | 864525,5 |
| decane                           | 124-18-5     | 0,1635 | ↑ | 668251   | 714153   |
| 1-butoxy-2-propanol              | 5131-66-8    | 0,1671 | ↑ | 341984   | 434783   |
| 2-hexanone                       | 591-78-6     | 0,1828 | ↑ | 151670,5 | 176214   |
| pentanal                         | 110-62-3     | 0,1880 | ↑ | 476091   | 513131   |
| 1,3,5,7-cyclooctatetraene        | 629-20-9     | 0,1906 | ↑ | 240164   | 324019   |
| ethylidene-cyclopropane          | 18631-83-9   | 0,1943 | ↑ | 47931497 | 58528704 |
| 2-butoxy-ethanol                 | 111-76-2     | 0,1952 | ↑ | 240105   | 281481   |
| ethanol                          | 64-17-5      | 0,2072 | ↑ | 1802018  | 2949049  |
| tetramethyl-2,3,5,8-decane       | 192823-15-7  | 0,2109 | ↑ | 1193103  | 1567084  |
| 2-methyl-butane                  | 78-78-4      | 0,2271 | ↑ | 590062   | 641142   |
| benzeneacetaldehyde              | 122-78-1     | 0,2321 | ↑ | 373304   | 450221   |
| decanal                          | 112-31-2     | 0,2416 | ↑ | 2889239  | 2924331  |
| 2,3-dimethyl-pentane             | 565-59-3     | 0,2556 | ↓ | 164087   | 159752   |
| 1-ethyl-4-methyl-benzene         | 622-96-8     | 0,2766 | ↓ | 148937   | 137734   |
| indole                           | 120-72-9     | 0,2794 | ↓ | 1209785  | 994601   |
| 1-propanol                       | 71-23-8      | 0,2871 | ↑ | 2020280  | 2350362  |
| 2-ethyl-1-hexanol                | 104-76-7     | 0,2916 | ↑ | 1838321  | 2036166  |
| nonyl phenyl ester carbonic acid | 1000314-57-3 | 0,3011 | ↑ | 739448   | 850432   |
| 5-ethylidihydro-2(3h)-furanone   | 695-06-7     | 0,3245 | ↑ | 68707    | 77532    |
| isopropyl alcohol                | 67-63-0      | 0,3370 | ↓ | 67790453 | 45401775 |
| acenaphthene                     | 83-32-9      | 0,3699 | ↓ | 62682    | 57640    |
| 1,1'-oxybis-octane               | 629-82-3     | 0,3788 | ↑ | 376442   | 459867   |
| methyl isobutyl ketone           | 108-10-1     | 0,3850 | ↓ | 199264   | 177063   |
| p-cymene                         | 99-87-6      | 0,3945 | ↓ | 445369   | 302998   |
| d-limonene                       | 5989-27-5    | 0,4170 | ↑ | 4097534  | 4312191  |

|                                |            |        |   |         |         |
|--------------------------------|------------|--------|---|---------|---------|
| 2-hydroxy-iso-butyrophenone    | 7473-98-5  | 0,4274 | ↑ | 674415  | 710831  |
| 1-nonanol                      | 143-08-8   | 0,4371 | ↑ | 325692  | 350332  |
| pentadecane                    | 629-62-9   | 0,4445 | ↑ | 2038993 | 2208191 |
| 1-(methylthio)-propane         | 3877-15-4  | 0,4536 | ↑ | 446492  | 516631  |
| 3-heptanone                    | 106-35-4   | 0,4803 | ↑ | 296116  | 308059  |
| methyl vinyl ketone            | 78-94-4    | 0,5187 | ↑ | 1040030 | 1233134 |
| dl-menthol                     | 89-78-1    | 0,5290 | ↑ | 150085  | 176186  |
| 2-methyl-2-propanol            | 75-65-0    | 0,5325 | ↑ | 2208838 | 2792861 |
| 1-decanol                      | 112-30-1   | 0,5353 | ↑ | 308903  | 348552  |
| phenol                         | 108-95-2   | 0,5712 | ↓ | 7981579 | 7323044 |
| benzonitrile                   | 100-47-0   | 0,5776 | ↑ | 558344  | 623925  |
| biphenyl                       | 92-52-4    | 0,6004 | ↑ | 79018   | 109412  |
| 1-octanol                      | 111-87-5   | 0,6262 | ↑ | 532905  | 557608  |
| 2,3-butanedione                | 431-03-8   | 0,6603 | ↑ | 1090337 | 1231381 |
| 2-methyl-1,3,6-trioxocane      | 2781-01-3  | 0,6827 | ↑ | 431124  | 545008  |
| heptadecane                    | 629-78-7   | 0,6851 | ↓ | 801892  | 717741  |
| allyl methyl sulfide           | 10152-76-8 | 0,7439 | ↑ | 589161  | 604135  |
| tetrachloroethylene            | 127-18-4   | 0,7539 | ↓ | 192903  | 162847  |
| tridecanal                     | 10486-19-8 | 0,7581 | ↑ | 420528  | 422591  |
| cyclohexane                    | 110-82-7   | 0,7652 | ↑ | 579677  | 629151  |
| n-hexane                       | 110-54-3   | 0,7743 | ↑ | 154347  | 165048  |
| butyl-cyclobutane              | 13152-44-8 | 0,7756 | ↑ | 121538  | 133191  |
| 1-methoxy-2-propyl acetate     | 108-65-6   | 0,7829 | ↑ | 286221  | 374213  |
| dodecane                       | 112-40-3   | 0,7829 | ↑ | 864686  | 868689  |
| octyl ester octanoic acid      | 2306-88-9  | 0,8349 | ↑ | 500694  | 505542  |
| 4-methyl-octane                | 2216-34-4  | 0,8862 | ↑ | 184788  | 190877  |
| 2-methyl-1-propanol            | 78-83-1    | 0,9307 | ↓ | 1178750 | 1020187 |
| 3-methyl-hexane                | 589-34-4   | 0,9442 | ↑ | 324715  | 342228  |
| tridecane                      | 629-50-5   | 0,9626 | ↑ | 1582233 | 1653646 |
| 1-hexene                       | 592-41-6   | 0,9821 | ↓ | 329981  | 311961  |
| 2,2,4,6,6-pentamethyl- heptane | 13475-82-6 | 0,9854 | ↑ | 410893  | 443009  |
| benzophenone                   | 119-61-9   | 0,9967 | ↑ | 132838  | 135102  |
| butanal                        | 123-72-8   | 1,0000 | ↓ | 840323  | 804037  |
| 2,3-dimethyl-hexane            | 584-94-1   | 1,0000 | ↓ | 354395  | 329912  |
| 2-methyl-hexane                | 591-76-4   | 1,0000 | ↑ | 270492  | 284336  |
